# Supplementary material for: A systematic review of source attribution of human campylobacteriosis using multilocus sequence typing
Source: PubMed Central journal article supplement (PMC6820127; doi:10.2807/1560-7917.es.2019.24.43.1800696), 2019-10-24
Supplement: 1800696_MCCARTHY_SupplementaryTable.pdf [file 1800696_MCCARTHY_SupplementaryTable.pdf]

This supplementary material is hosted by Eurosurveillance as supporting information alongside the article “A systematic review of source attribution of human campylobacteriosis using multi-locus sequence typing”, on behalf of the authors, who remain responsible for the accuracy and appropriateness of the content. The same standards for ethics, copyright, attributions and permissions as for the article apply. Supplements are not edited by Eurosurveillance and the journal is not responsible for the maintenance of any links or email addresses provided therein."

Supplementary Table. Summary of published studies using multi-locus sequence typing for source attribution

| Attribution Model | Source Animal Dataset                                                                                                               | Clinical Dataset                                                                           | Species          | Attribution to Poultry (%)   | Attribution to Other Sources (%)                               | >1 sample type per source | Self-attribution analysis (%) | Reference (First author/year) |
|-------------------|-------------------------------------------------------------------------------------------------------------------------------------|--------------------------------------------------------------------------------------------|------------------|------------------------------|----------------------------------------------------------------|---------------------------|-------------------------------|-------------------------------|
| STRUCTURE         | Chicken 1,288<br>Cattle 586<br>Sheep 249<br>Wild bird 170<br>Environmental 91<br>from UK, USA, Europe, New Zealand<br>1990 – 2006   | 3,451 from Scotland<br>2005-2006                                                           | <i>C. jejuni</i> | 46.4                         | 31.0 ruminant<br>1.9 wild bird                                 | Yes                       | No                            | Bessell (2012)                |
| Asymmetric Island | Chicken 185<br>Cattle 171<br>Duck 70<br>Turkey 96<br>Pig 4<br>from Denmark<br>Chicken 137<br>from other EU countries<br>2007 – 2008 | 406:<br>246 from Denmark<br>109 travel-related<br>51 unknown travel history<br>2007 - 2008 | <i>C. jejuni</i> | 52.0 Danish<br>17.0 imported | 17.0 cattle<br>5.0 turkey<br>2.0 duck<br>7.0 pig               | Yes                       | No                            | Boysen (2014)                 |
| Hald Model        | Chicken 185<br>Cattle 171<br>Duck 70<br>Turkey 96<br>Pig 4<br>from Denmark<br>Chicken 137<br>from other EU countries<br>2007 – 2008 | 406:<br>246 from Denmark<br>109 travel-related<br>51 unknown travel history<br>2007 - 2008 | <i>C. jejuni</i> | 38.0 Danish<br>14.0 imported | 16.0 cattle<br>6.0 turkey<br>3.0 duck<br>0.0 pig               | Yes                       | No                            | Boysen (2014)                 |
| STRUCTURE         | Chicken 742<br>Cattle 582<br>Sheep 217<br>Wild bird 921<br>from UK, Sweden, Australia<br>1999 – 2006                                | 5,618 from UK<br>2003 - 2013                                                               | <i>C. jejuni</i> | 47.1 - 56.7                  | 15.0 - 20.5 cattle<br>25.0 - 31.1 sheep<br>2.1 - 3.5 wild bird | No                        | No                            | Cody (2015)                   |

|                   |                                                                                                                    |                                        |                  |      |                                                                                    |     |    |                         |
|-------------------|--------------------------------------------------------------------------------------------------------------------|----------------------------------------|------------------|------|------------------------------------------------------------------------------------|-----|----|-------------------------|
| Asymmetric Island | 583 from Italy<br>6,854 from PubMLST<br>(European)<br>na                                                           | 31 from Italy<br>2012                  | <i>C. jejuni</i> | 69.8 | 8.3 cattle<br>5.3 small ruminant<br>7.3 wild bird<br>6.3 environmental<br>3.0 pork | Yes | No | Di Giannatale<br>(2016) |
| Asymmetric Island | Chicken 275<br>Cattle 95<br>Sheep 136<br>Environmental water 92<br>Wild bird 22<br>from New Zealand<br>2005 - 2008 | 502 from New<br>Zealand<br>2005 - 2008 | <i>C. jejuni</i> | 75.0 | 17.0 cattle<br>4.0 sheep<br>2.0 wild bird<br><1.0 water                            | Yes | No | French (2008)           |
| Dutch Model       | Chicken 275<br>Cattle 95<br>Sheep 136<br>Environmental water 92<br>Wild bird 22<br>from New Zealand<br>2005 - 2008 | 502 from New<br>Zealand<br>2005 - 2008 | <i>C. jejuni</i> | 52.0 | 17.0 cattle<br>10.0 sheep<br>5.0 wild bird<br>11.0 water                           | Yes | No | French (2008)           |
| Modified Hald     | Chicken 275<br>Cattle 95<br>Sheep 136<br>Environmental water 92<br>Wild bird 22<br>from New Zealand<br>2005 - 2008 | 502 from New<br>Zealand<br>2005 - 2008 | <i>C. jejuni</i> | 67.0 | 23.0 cattle<br>8.0 sheep<br>1.0 wild bird<br><1.0 water                            | Yes | No | French (2008)           |
| STRUCTURE         | Chicken 435<br>Cattle 73<br>Dog 134<br>from Switzerland and other<br>countries<br>2003 - 2014                      | 351 from<br>Switzerland<br>2009        | <i>C. jejuni</i> | 44.0 | 36.0 cattle<br>20.0 dog                                                            | Yes | No | Jonas (2015)            |
| STRUCTURE         | Chicken 175<br>Cattle 24<br>Pig 256<br>from Switzerland and other<br>countries<br>2008 - 2014                      | 32 from<br>Switzerland<br>2009         | <i>C. coli</i>   | 76.0 | 16.0 cattle<br>8.0 pig                                                             | Yes | No | Jonas (2015)            |

|                   |                                                                                                                                                                  |                                                      |                  |      |                                                 |     |                                  |                 |
|-------------------|------------------------------------------------------------------------------------------------------------------------------------------------------------------|------------------------------------------------------|------------------|------|-------------------------------------------------|-----|----------------------------------|-----------------|
| STRUCTURE         | Chicken 435<br>Dog 159<br>from Switzerland<br>2002 – 2012                                                                                                        | 649 from<br>Switzerland<br>2002 - 2012               | <i>C. jejuni</i> | 76.8 | 23.2 dog                                        | Yes | Yes;<br>62.5 chicken<br>38.1 dog | Kittl (2013)    |
| STRUCTURE         | Chicken 175<br>Pig 360<br>from Switzerland<br>2002 - 2012                                                                                                        | 81 from<br>Switzerland<br>2002 - 2012                | <i>C. coli</i>   | 86.4 | 13.6 pig                                        | Yes | Yes;<br>79.8 chicken<br>70.1 pig | Kittl (2013)    |
| STRUCTURE         | Poultry 162<br>Cattle 40<br>Environmental 12<br>Slovenia, Austria, Germany<br>2002 – 2014                                                                        | 69 from Slovenia,<br>Austria, Germany<br>2002 - 2014 | <i>C. jejuni</i> | 58.0 | 34.8 cattle<br>7.2 environmental                | Yes | No                               | Kovac (2017)    |
| STRUCTURE         | Chicken 257<br>Cattle 87<br>Wild bird 63<br>Environmental water 266<br>from Canada<br>2005 – 2007                                                                | 178 from Canada<br>2005 - 2007                       | <i>C. jejuni</i> | 64.5 | 25.8 cattle<br>7.4 water<br>2.3 wild bird       | No  | No                               | Levesque (2013) |
| Asymmetric Island | Poultry 178<br>Cattle 98<br>Sheep 4<br>Goats 3<br>Pigs 2<br>Environmental water 207<br>from Luxembourg, The<br>Netherlands, Belgium and<br>France<br>2003 – 2014 | 1,153 from<br>Luxembourg<br>2010 - 2013              | <i>C. jejuni</i> | 58.8 | 36.3 ruminant<br>4.9 environmental<br>0.2 swine | Yes | No                               | Mossong (2016)  |
| Asymmetric Island | Poultry 150<br>Cattle 1<br>Goats 1<br>Pigs 60<br>Environmental water 122<br>from Luxembourg, The<br>Netherlands, Belgium and<br>France<br>2003 – 2014            | 136 from<br>Luxembourg<br>2010 - 2013                | <i>C. coli</i>   | 82.4 | 8.8 ruminant<br>4.5 environmental<br>4.4 swine  | Yes | No                               | Mossong (2016)  |

|                   |                                                                                                                                             |                                         |                                      |                                                                           |                                                            |     |    |                     |
|-------------------|---------------------------------------------------------------------------------------------------------------------------------------------|-----------------------------------------|--------------------------------------|---------------------------------------------------------------------------|------------------------------------------------------------|-----|----|---------------------|
| Asymmetric Island | 960 from The Netherlands, UK, Scotland and Switzerland - not detailed by species<br>1990 – 2006                                             | 696 from The Netherlands<br>2002 - 2003 | <i>C. jejuni</i>                     | 66.1                                                                      | 21.2 cattle<br>10.2 environmental<br>2.4 sheep<br>0.01 pig | Yes | No | Mughini Gras (2012) |
| Asymmetric Island | As above – not detailed by species                                                                                                          | 41 from The Netherlands<br>2002-2003    | <i>C. coli</i>                       | 70.0                                                                      | 12.2 cattle<br>8.9 environmental<br>5.0 sheep<br>4.9 pig   | Yes | No | Mughini Gras (2012) |
| Asymmetric Island | Chicken 625<br>Cattle 168<br>Sheep 168<br>Pigs 160<br>Pets 133<br>Environmental 289<br>from The Netherlands, UK, Switzerland<br>1990 – 2006 | 737 from The Netherlands<br>2002 - 2003 | <i>C. jejuni</i><br>& <i>C. coli</i> | 77.0                                                                      | 18.0 cattle<br>2.0 environmental<br>2.0 sheep<br>1.0 pig   | Yes | No | Mughini Gras (2013) |
| Modified Hald     | Chicken 275<br>Cattle 95<br>Sheep 136<br>Environmental water 92<br>Wild bird 22<br>from New Zealand<br>2005 – 2008                          | 773 from NZ<br>2005 - 2008              | <i>C. jejuni</i>                     | 80.0                                                                      | 10.0 cattle<br>9.0 sheep<br>4.0 environmental              | Yes | No | Mullner (2009a)     |
| Asymmetric Island | Chicken 275<br>Cattle 95<br>Sheep 136<br>Environmental water 92<br>Wild bird 22<br>from New Zealand<br>2005 – 2008                          | 502 from New Zealand<br>2005 - 2008     | <i>C. jejuni</i>                     | 76.0                                                                      | 18.0 cattle                                                | Yes | No | Mullner (2009b)     |
| Modified Hald     | Chicken 275<br>Cattle 95<br>Sheep 136<br>Environmental water 92<br>Wild bird 22<br>from New Zealand<br>2005 – 2008                          | 502 from New Zealand<br>2005 - 2008     | <i>C. jejuni</i>                     | >58.0 (58% from one poultry producer, total across 3 producers not given) | na                                                         | Yes | No | Mullner (2009b)     |

|                   |                                                                                                                                                                 |                                                          |                  |      |                                                        |     |    |                 |
|-------------------|-----------------------------------------------------------------------------------------------------------------------------------------------------------------|----------------------------------------------------------|------------------|------|--------------------------------------------------------|-----|----|-----------------|
| Dutch Model       | Chicken 275<br>Cattle 95<br>Sheep 136<br>Environmental water 92<br>Wild bird 22<br>from New Zealand<br>2005 – 2008                                              | 502 from New Zealand<br>2005 - 2008                      | <i>C. jejuni</i> | 58.0 | 19.0 cattle<br>12.0 environmental<br>11.0 sheep        | Yes | No | Mullner (2009b) |
| Asymmetric Island | Poultry 108<br>Cattle 17<br>Sheep 32<br>Environmental water 11<br>from New Zealand<br>2009 - 2014                                                               | 47 from New Zealand<br>2005 - 2014                       | <i>C. coli</i>   | 38.0 | 55.0 ruminant<br>7.0 environmental                     | No  | No | Nohra (2016)    |
| Asymmetric Island | Chicken 1,081<br>Cattle 200<br>Other poultry 101<br>Pig 10<br>Pet 164<br>from Germany, Luxembourg,<br>Switzerland and The<br>Netherlands<br>2003 – 2014         | 536 from Germany<br>2011 - 2014                          | <i>C. jejuni</i> | 83.0 | 1.0 cattle<br>9.0 other poultry<br>16.0 pet<br>0.1 pig | Yes | No | Rosner (2017)   |
| Asymmetric Island | Chicken 425<br>Pig 471<br>Pet 3<br>Cattle 7<br>Other poultry 59<br>from Belgium, France,<br>Germany, Luxembourg,<br>Switzerland, The Netherlands<br>2003 – 2011 | 76<br>2011-2014<br>460 from<br>Luxembourg<br>2003 - 2013 | <i>C. coli</i>   | 56.0 | 0.4 cattle<br>32.0 pig<br>4.0 pet<br>8.0 other poultry | Yes | No | Rosner (2017)   |
| STRUCTURE         | Chicken 459<br>Cattle 85<br>Sheep 57<br>Pigs 322<br>from Scotland<br>2005 – 2006                                                                                | 307 from Scotland<br>2005 - 2006                         | <i>C. coli</i>   | 40.0 | 41.0 sheep<br>14.0 cattle<br>6.0 pig                   | Yes | No | Roux (2013)     |

|                   |                                                                                                                                          |                                        |                  |      |                                                        |     |                                                                       |                 |
|-------------------|------------------------------------------------------------------------------------------------------------------------------------------|----------------------------------------|------------------|------|--------------------------------------------------------|-----|-----------------------------------------------------------------------|-----------------|
| Modified Hald     | 811:<br>Chicken<br>Cattle<br>Sheep<br>Environmental water<br>from New Zealand<br>2005 – 2008                                             | 572 from New<br>Zealand<br>2005 - 2008 | <i>C. jejuni</i> | 62.0 | 25.6 cattle<br>8.8 sheep<br>3.2 water                  | Yes | No                                                                    | Sears (2011)    |
| Asymmetric Island | Chicken 1,288<br>Cattle 586<br>Sheep 249<br>Wild bird 170<br>Environmental 91<br>from UK, USA, Europe, New<br>Zealand<br>1990 - 2006     | 4,743 from<br>Scotland<br>2005 - 2006  | <i>C. jejuni</i> | 78.0 | 18.0 ruminant<br>4.0 wild bird &<br>environment        | Yes | Yes:<br>97 chicken<br>98 ruminant<br>77 wild bird<br>62 environmental | Sheppard (2009) |
| STRUCTURE         | Chicken 1,288<br>Cattle 586<br>Sheep 249<br>Wild bird 170<br>Environmental 91<br>from UK, USA, Europe, New<br>Zealand<br>1990 – 2006     | 4,743 from<br>Scotland<br>2005 - 2006  | <i>C. jejuni</i> | 58.0 | 38.0 ruminant<br>4.0 wild bird &<br>environment        | Yes | Yes;<br>70 chicken<br>84 ruminant<br>54 wild bird<br>38 environmental | Sheppard (2009) |
| Asymmetric Island | Chicken 514<br>Cattle 98<br>Sheep 54<br>Pig 380<br>Turkey 110<br>Environmental 67<br>from UK, USA, Europe, New<br>Zealand<br>1990 – 2006 | 504 from Scotland<br>2005 - 2006       | <i>C. coli</i>   | 57.0 | 41.0 ruminant<br>1.0 pig<br>0.5 turkey<br>0.5 riparian | Yes | Yes;<br>na                                                            | Sheppard (2009) |
| STRUCTURE         | Chicken 459<br>Cattle 86<br>Sheep 57<br>Pigs 322<br>Turkey 111<br>UK, USA, Europe, New<br>Zealand<br>1990 – 2006                         | 504 from Scotland<br>2005 - 2006       | <i>C. coli</i>   | 40.0 | 40.0 sheep<br>14.0 cattle<br>6.0 pig<br><1.0 turkey    | Yes | Yes;<br>na                                                            | Sheppard (2009) |

|                   |                                                                                                                                      |                                                       |                                      |      |                                                          |     |                                                                           |                 |
|-------------------|--------------------------------------------------------------------------------------------------------------------------------------|-------------------------------------------------------|--------------------------------------|------|----------------------------------------------------------|-----|---------------------------------------------------------------------------|-----------------|
| Asymmetric Island | 1,223 worldwide<br>2000 - 2008                                                                                                       | 500 from Scotland<br>2005 - 2006                      | <i>C. coli</i>                       | 57.0 | 41.0 ruminant<br>1.0 swine<br>0.5 turkey<br>0.5 riparian | Yes | Yes;<br>95 chicken<br>89 ruminant<br>94 swine<br>92 turkey<br>88 riparian | Sheppard (2010) |
| Asymmetric Island | Chicken 400<br>Cattle 168<br>Sheep 160<br>Pig 133<br>Environmental 289<br>from The Netherlands, UK<br>and Switzerland<br>1983 – 2007 | 1,208 from The<br>Netherlands<br>2000 - 2011          | <i>C. jejuni</i><br>& <i>C. coli</i> | 68.0 | 24.0 cattle<br>6.0 environmental<br>2.0 sheep and pig    | Yes | Yes;<br>89 chicken                                                        | Smid (2013)     |
| STRUCTURE         | 680 from Scotland<br>2005 - 2006                                                                                                     | 202 from rural<br>children<br>Scotland<br>2000 - 2006 | <i>C. jejuni</i><br>& <i>C. coli</i> | 19.0 | 42.0 cattle<br>24.0 wild bird<br>12.0 sheep<br>3.0 pig   | No  | No                                                                        | Strachan (2009) |
| STRUCTURE         | 680 from Scotland<br>2005 - 2006                                                                                                     | 76 from urban<br>children Scotland<br>2000 - 2006     | <i>C. jejuni</i><br>& <i>C. coli</i> | 43.0 | 35.0 cattle<br>6.0 wild bird<br>15.0 sheep<br>1 pig      | No  | No                                                                        | Strachan (2009) |
| STRUCTURE         | 84 from Scotland<br>2001                                                                                                             | 172 from Scotland<br>2001                             | <i>C. jejuni</i><br>& <i>C. coli</i> | 47.7 | 19.5 cattle<br>11.2 sheep<br>19.6 wild bird<br>1.8 pig   | No  | No                                                                        | Strachan (2013) |
| STRUCTURE         | 456 from Scotland<br>2005 – 2007                                                                                                     | 1,452 from<br>Scotland<br>2005 - 2007                 | <i>C. jejuni</i><br>& <i>C. coli</i> | 43.8 | 22.5 cattle<br>14.2 sheep<br>17.5 wild bird<br>0.03 pig  | No  | No                                                                        | Strachan (2013) |
| STRUCTURE         | 708 from Scotland<br>2010 – 2012                                                                                                     | 1,292 from<br>Scotland<br>2010 - 2012                 | <i>C. jejuni</i><br>& <i>C. coli</i> | 48.7 | 12.7 cattle<br>26.8 sheep<br>9.2 wild bird<br>2.6 pig    | No  | No                                                                        | Strachan (2013) |

|                   |                                                                                                                                                                      |                                         |                  |      |                                                                                             |     |                                       |                 |
|-------------------|----------------------------------------------------------------------------------------------------------------------------------------------------------------------|-----------------------------------------|------------------|------|---------------------------------------------------------------------------------------------|-----|---------------------------------------|-----------------|
| STRUCTURE*        | Chicken 304<br>Cattle 43<br>Sheep 3<br>Wild bird 8<br>Environmental water 81<br>Duck 3<br>Dog 3<br>Goose 3<br>Other 52<br>from Europe and N. America<br>2001 – 2012  | 42 from France<br>2009                  | <i>C. jejuni</i> | 45.8 | 46.9 ruminant<br>7.3 environmental                                                          | Yes | Yes;<br>80.7 chicken<br>68.2 ruminant | Thépault (2017) |
| STRUCTURE*        | Chicken 304<br>Cattle 43<br>Sheep 3<br>Wild bird 8<br>Environmental water 81<br>Duck 3<br>Dog 3<br>Goose 3<br>Other 52<br>from Europe and N. America<br>2001 – 2012  | 281 from UK<br>2010 - 2011              | <i>C. jejuni</i> | 56.8 | 37.1 ruminant<br>6.1 environmental                                                          | Yes | Yes;<br>80.7 chicken<br>68.2 ruminant | Thépault (2017) |
| Asymmetric Island | Chicken 515<br>Cattle 282<br>Sheep 160<br>Pig 30<br>Wild bird 44<br>Rabbit 20<br>Sand 71<br>Water 23<br>from UK, Europe, Senegal,<br>USA, New Zealand<br>1990 – 2000 | 1,231 from NW<br>England<br>2000 - 2002 | <i>C. jejuni</i> | 56.5 | 35.0 cattle<br>4.3 sheep<br>0.8 pig<br>1.7 wild bird<br>0.6 rabbit<br>0.9 sand<br>0.2 water | Yes | No                                    | Wilson (2008)   |

na: details not available.

\* 15-locus MLST
